# Supplementary material
Source: PubMed Central journal article supplement (PMC4119851)

- 1 **Online Repository Materials**
- 2 **Neonatal rhinovirus induces mucous metaplasia and airways hyperresponsiveness via**
- 3 **IL-25 and ILC2s**

#### 4 **Methods**

5 *Generation of RV.* RV1B (ATCC, Manassas, VA) were grown in HeLa cells,  
6 concentrated and partially purified<sup>1</sup>. Similarly concentrated and purified HeLa cell lysates were  
7 used for sham infection. Viral titer was measured by fifty percent tissue culture infectivity doses  
8 (TCID<sub>50</sub>) using the Spearman-Kärber method<sup>2</sup> or by plaque assay<sup>3</sup>. For the plaque assay,  
9 HeLa cell monolayers were infected with serially-diluted RV and overlaid with a 0.6% agarose  
10 solution. Plaque growth was monitored by light microscopy and was confirmed by staining with  
11 crystal violet.

12 *Assessment of airway responsiveness.* Airway cholinergic responsiveness was  
13 assessed by measuring changes in total respiratory system resistance in response to increasing  
14 doses of nebulized methacholine<sup>4</sup>. Mice were anesthetized with sodium pentobarbital (50  
15 mg/kg mouse, intraperitoneal injection) and a tracheostomy performed. Mechanical ventilation  
16 was conducted and total respiratory system measured using a Buxco FinePointe operating  
17 system (Buxco, Wilmington, NC). Airway responsiveness was assessed by measuring changes  
18 in resistance in response to increasing doses of nebulized methacholine. Statistical analysis  
19 was performed using two-way ANOVA with repeated measures, employing Graph Pad Prism  
20 6.0 software program.

21 *Histology and immunohistochemistry.* Lungs were collected and fixed with 10%  
22 formaldehyde and paraffin embedded. Blocks were sectioned at 500- $\mu$ m intervals at a thickness  
23 of 5  $\mu$ m, and each section was deparaffinized and hydrated. After antigen demasking and  
24 permeabilization, sections were incubated with Alexa Fluor (AF)-488-conjugated rabbit anti-  
25 mouse IL-25/IL-17E (Millipore, Billerica, MA), guinea pig antiserum against HRV1B (ATCC), or  
26 AF-conjugated isotype control IgGs. Antiserum was partially purified by incubation with  
27 nitrocellulose-bound HeLa cell proteins and passing through an affinity resin containing  
28 nondenatured mouse lung protein, as described previously<sup>5</sup>. Repurified antibody was directly  
29 conjugated to AF594. The control used was AF594-conjugated guinea pig antiserum. Nuclei

30 were stained with 4',6-diamidino-2-phenylindole. Images were visualized using a Zeiss Axioplan  
31 microscope equipped with an ApoTome and digital AxioCamMR charge-coupled device camera.  
32 To visualize mucus, deparaffinized sections were stained with periodic acid-Schiff (Sigma-  
33 Aldrich, St. Louis, MO).

34 *Measurement of IL-13 and IL-25.* IL-13 and IL-25 concentrations were measured with  
35 ELISA (eBioscience, San Diego, CA). The amount of IL-25 per lung weight was calculated by  
36 multiplying the concentration by the volume of lung homogenate divided by the weight of lungs.

37 *Real-time quantitative PCR.* Lung RNA was extracted with Trizol method (Invitrogen,  
38 Carlsbad, CA) with the combination of on-column digestion of genomic DNA (Qiagen, Valencia,  
39 CA). cDNA was synthesized from 1 µg of RNA and subjected to quantitative real-time PCR  
40 using specific mRNA primers for IL-4, IL-5, IL-13, IFN-γ, IL-12p40, TNF-α, Muc5ac, Muc5b,  
41 Gob5 and IL-17RB. The sequences of specific primers are provided (Supplemental Table  
42 E1). The level of gene expression was normalized to mRNA of GAPDH.

43 *Flow cytometric analysis.* Lungs were perfused with PBS containing EDTA, minced and  
44 digested in collagenase IV. Cells were filtered and washed with RBC lysis buffer, and dead cells  
45 were stained with Pac-Orange Live/Dead fixable dead staining dye (Invitrogen, Carlsbad, CA).  
46 Lung cells were then stained with FITC-conjugated antibodies for lineage markers (CD3ε, TCRβ,  
47 B220/CD45R, Ter-119, Gr-1/Ly-6G/Ly-6C, CD11b, CD11c, F4/80 and FcεR1α, from Biolegend),  
48 anti-CD25-PerCP-Cy5.5 (Biolegend), anti-CD127-PE-Cy5 (eBioscience, San Diego, CA), anti-c-  
49 kit/CD117-APC (eBioscience), anti-sca-1-PE-Cy7 (eBioscience), anti-T1/ST2-PE (R&D Systems,  
50 Minneapolis, MN) and anti-IL-17RB (R&D Systems) conjugated with AF750. Cells were fixed,  
51 subjected to flow cytometry and analyzed on a FACS Aria II (BD Biosciences, San Jose, CA).  
52 Data were collected using FACSDiva software (BD Biosciences) and analyzed using FlowJo  
53 software (Tree Star, Ashland, OR). For analysis of intracellular IL-13, fresh aliquots of lung  
54 mince were stimulated for 5 h with cell stimulation cocktail (40.5 µM phorbol 12-myristate 13-  
55 acetate, 670 µM ionomycin, 5.3 mM brefeldin A, 1 mM monensin, eBioscience), Cells were then

56 stained for live/dead and surface markers, fixed, permeabilized and incubated with anti-mouse  
57 IL-13 clone eBio13A (eBioscience). Cells were analyzed with the FACS Aria II.

58 *Fluorescence-activated cell sorting of ILC2s.* Lineage-negative CD25 and CD127  
59 double-positive ILC2s or lineage-negative CD25 and CD127 double-negative cells were sorted  
60 at 9000 cells/200  $\mu$ l into 96 well plates and stimulated with media, IL-25 (20 ng/ml), IL-2 (50  
61 ng/ml) + IL-25 (20 ng/ml) or PMA + ionomycin for 3 days. To visualize ILC2s, cells were  
62 stained with Diff-Quick (Dade Behring, Newark, DE).

63 **TABLE E1.** qPCR primers.

64

| <i>Gene name</i> | <i>Forward primer (5'-&gt;3')</i> | <i>Reverse primer (3'-&gt;5')</i> |
|------------------|-----------------------------------|-----------------------------------|
| GAPDH            | GTC GGT GTG AAC GGA TTT G         | GTC GTT GAT GGC AAC AAT CTC       |
| Gob5             | CTG TCT TCC TCT TGA TCC TCC A     | CGT GGT CTA TGG CGA TGA CG        |
| IFN-g            | TGG CTG TTT CTG GCT GTT AC        | TCC ACA TCT ATG CCA CTT GAG TT    |
| IL-12p40         | CTC CTG GTT TGC CAT CGT TT        | GGG AGT CCA GTC CAC CTC TA        |
| IL-13            | CCT GGC TCT TGC TTG CGT           | GGT CTT GTG TGA TGT TGC TCA       |
| IL-17RB          | ACC TTC CGG CGG CAA ATG GAC       | GCA TTG GGG ATG TTA TGG GCG CT    |
| IL-25            | ACA GGG ACT TGA ATC GGG TC        | TGG TAA AGT GGG ACG GAG TTG       |
| IL-33            | GGC TGC ATG CCA AGG ACA AGG       | AAG GCC TGT TCC GGA GGC GA        |
| IL-4             | GGT CTC AAC CCC CAG CTA GT        | GCC GAT GAT CTC TCT CAA GTG AT    |
| IL-5             | CTC TGT TGA CAA GCA ATG AGA CG    | TCT TCA GTA TGT CTA GCC CCT G     |
| Mub5b            | GAG CAG TGG CTA TGT GAA AAT CAG   | CAG GGC GCT GTC TTC TTC AT        |
| Muc5ac           | AAA GAC ACC AGT AGT CAC TCA GCA A | CTG GGA AGT CAG TGT CAA ACC       |
| TNF-a            | ATG CAC CAC CAT CAA GGA CTC AA    | ACC ACT CTC CCT TTG CAG AAC TC    |

65

66

67 **FIG E1.** Viral copy number in RV-infected neonatal and adult mice. Six-day-old and eight week-  
68 old mice were inoculated with sham or RV intranasally. At specified times, lungs were  
69 harvested for analysis. Viral copy number was analyzed by qPCR. Shown are individual data,  
70 medians and interquartile range for each time point.

71

72 **FIG E2.** Persistent expression of mucus-related gene expression in 8 week-old mice infected  
73 with RV. Gene expression of Muc5ac, Muc5b, Gob5, and IL-13 was analyzed with quantitative  
74 PCR. \*  $P < 0.05$  versus sham (unpaired t-test).

75

76 **FIG E3.** Effect of RV infection on the expression of IL-25 and IL-33. Six-day-old neonatal  
77 BALB/c mice and eight-week-old mature mice were inoculated with sham or RV. Whole lung  
78 gene expression of IL-33 was measured 1-7 days after infection with quantitative PCR. \*  $P <$   
79  $0.01$  versus sham (unpaired t-test).

80

81 **FIG E4.** Effect of low-dosage RV infection in the induction of IL-25 and IFN- $\gamma$ . Six-day-old  
82 neonatal BALB/c mice were inoculated with sham, or RV (normal dosage), or RV (10-fold lower  
83 dosage). Whole lung gene expression of IL-25 and IFN- $\gamma$  mRNA was measured one day after  
84 infection with quantitative PCR. \*  $P < 0.05$  versus sham (unpaired t-test).

85

86 **FIG E5.** Lineage-negative cells in immature and mature mice. Six-day-old neonatal BALB/c  
87 mice and eight-week-old mature mice were inoculated with sham or RV. Lungs were collected  
88 14 days after infection. Cell suspensions were stained with a cocktail of lineage antibodies  
89 (CD3 $\epsilon$ , TCR $\beta$ , B220/CD45R, Ter-119, Gr-1/Ly-6G/Ly-6C, CD11b, CD11c, F4/80, and Fc $\epsilon$ R1 $\alpha$ )  
90 and subjected to flow cytometry. The percentage of lineage-negative live cells was calculated.  
91 †  $P < 0.05$  versus neonates (unpaired t-test).

92

93 **FIG E6.** Gating strategy for sorting ILC2s. Six-day-old neonatal BALB/c mice were infected with  
94 RV. After 8 days, lungs were processed for cell sorting. To sort ILC2s, low FSC, low SSC,  
95 DAPI-negative live cells were gated and incubated with lineage cocktail antibodies (CD3 $\epsilon$ , TCR $\beta$ ,  
96 B220/CD45R, Ter-119, Gr-1/Ly-6G/Ly-6C, CD11b, CD11c, F4/80, and Fc $\epsilon$ R1 $\alpha$ ). Finally, CD25  
97 and CD127 double positive cells were identified.

## 98 References

- 99 E1. Newcomb DC, Sajjan U, Nanua S, Jia Y, Goldsmith AM, Bentley JK, et al.  
100 Phosphatidylinositol 3-kinase is required for rhinovirus-induced airway epithelial cell  
101 interleukin-8 expression. *J. Biol. Chem.* 2005; 280:36952-61.
- 102 E2. Johnston SL, Tyrrell DAJ. Rhinoviruses. In: Lennette EH, Schmidt NJ, editors.  
103 Diagnostic Procedures for Viral, Rickettsial, and Chlamydial Infections. Washington D.C.:  
104 American Public Health Association; 1997. p. 553-63.
- 105 E3. Martin S, Casasnovas JM, Staunton DE, Springer TA. Efficient neutralization and  
106 disruption of rhinovirus by chimeric ICAM-1/immunoglobulin molecules. *J. Virol.* 1993;  
107 67:3561-8.
- 108 E4. Schneider D, Hong JY, Popova AP, Bowman ER, Linn MJ, McLean AM, et al. Neonatal  
109 rhinovirus infection induces persistent mucous metaplasia and airways  
110 hyperresponsiveness. *J. Immunol.* 2012; 188:2894-904.
- 111 E5. Schneider D, Hong JY, Bowman ER, Chung Y, Nagarkar DR, McHenry CL, et al.  
112 Macrophage/epithelial cell CCL2 contributes to rhinovirus-induced hyperresponsiveness  
113 and inflammation in a mouse model of allergic airways disease. *Am J Physiol Lung Cell*  
114 *Mol Physiol* 2013; 304:L162-9.
- 115



Figure E1

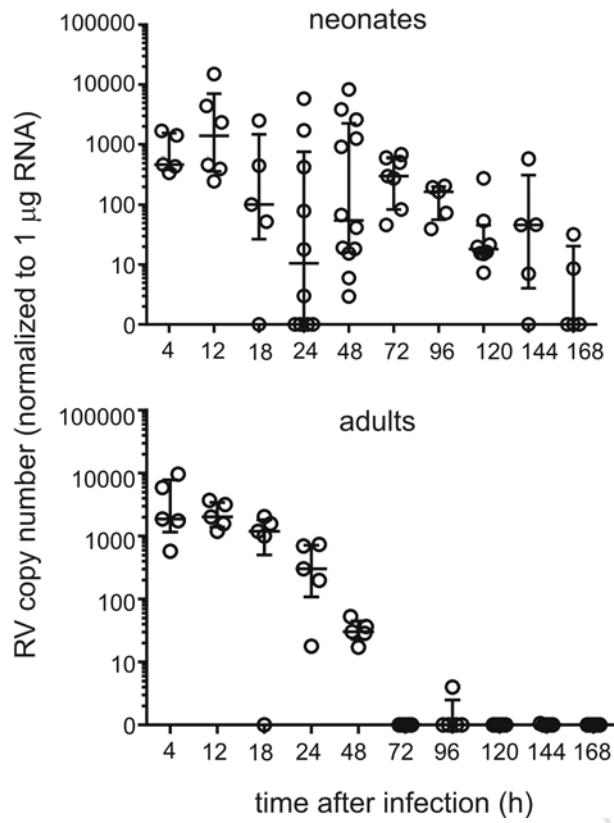

Figure E2

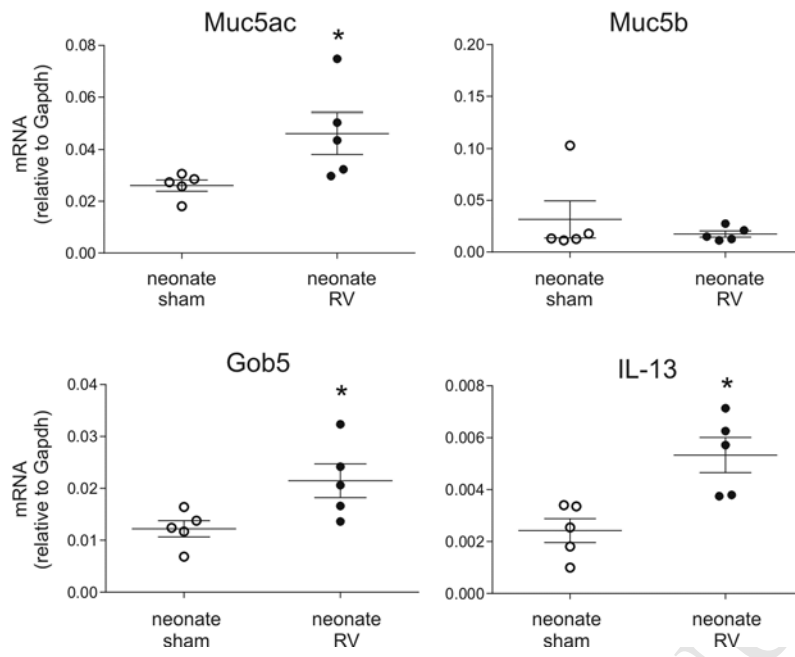

Figure E3

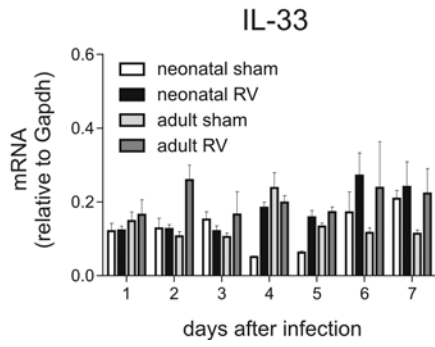

Figure E4

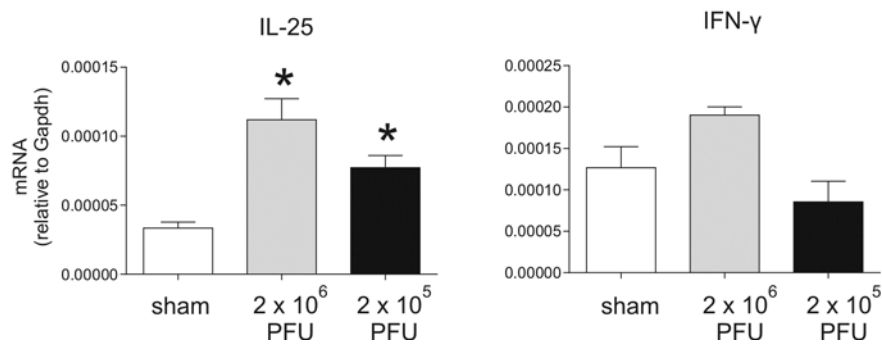

Figure E5

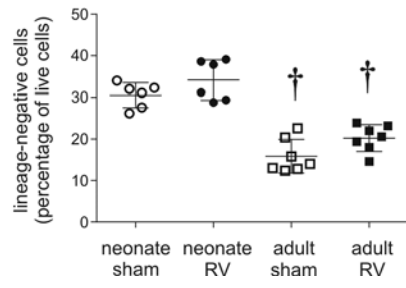

Figure E6

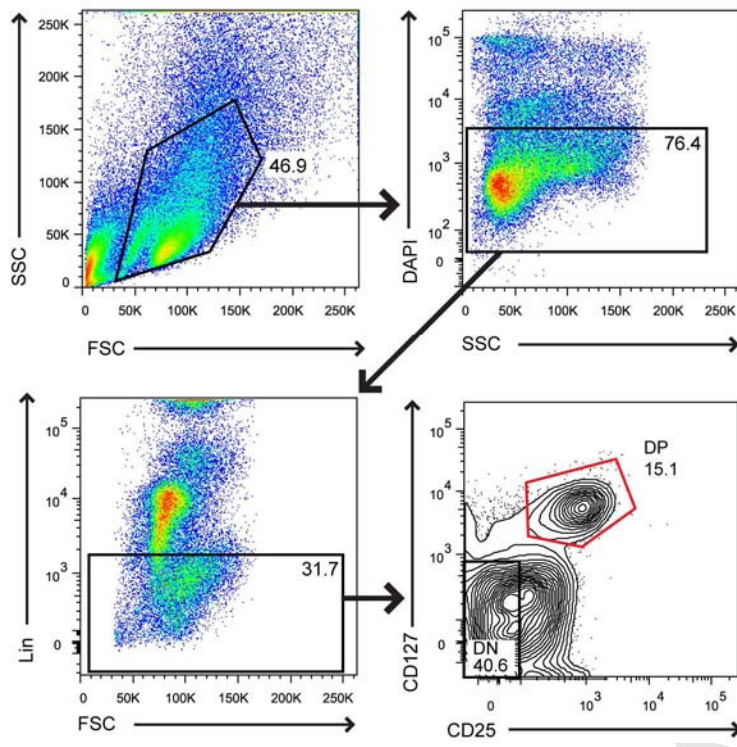

Supplement: NIHMS589721-supplement-supplement_1.pdf [file NIHMS589721-supplement-supplement_1.pdf]
